# Supplementary material
Source: ML conference proceedings conference paper supplement (https://proceedings.mlr.press/v97/bateni19a.html)
Supplement: Supplementary file [file bateni19a-supp.pdf]

## A. Supplement

### A.1. Proof of technical lemmas

#### Proof of Lemma 1

*Proof.* Let  $Z$  and  $Z'$  be the random variables corresponding to  $F(S \cup \{s\})$  and  $F(S)$  respectively. Note that we have

$$\begin{aligned} F(S) &= \sum_{z' \sim Z'} \sum_{c \in \{0,1\}} \Pr[Z' = z', C = c] \log \frac{\Pr[Z' = z', C = c]}{\Pr[Z' = z'] \Pr[C = c]} \\ &= \sum_{z' \sim Z'} \Pr[Z' = z'] \sum_{c \in \{0,1\}} \Pr[C = c | Z' = z'] \log \frac{\Pr[C = c | Z' = z']}{\Pr[C = c]} \\ &= \sum_{z' \sim Z'} \Pr[Z' = z'] f(\Pr[C = 0 | Z' = z']), \end{aligned}$$

where we have

$$f(t) = t \log \frac{t}{\Pr[C = 0]} + (1 - t) \log \frac{1 - t}{\Pr[C = 1]},$$

which is a convex function over  $t \in [0, 1]$ . Next, we have

$$\begin{aligned} \Delta_s F(S) &= F(S \cup \{s\}) - F(S) \\ &= \sum_{z \sim Z} \Pr[Z = z] f(\Pr[C = 0 | Z = z]) - \sum_{z' \sim Z'} \Pr[Z' = z'] f(\Pr[C = 0 | Z' = z']) \\ &= \Pr[Z = s'] f(\Pr[C = 0 | Z = s']) + \Pr[Z = s] f(\Pr[C = 0 | Z = s]) - \Pr[Z' = s'] f(\Pr[C = 0 | Z' = s']). \end{aligned}$$

Notice that  $Z' = s'$  implies that  $Z = s$  or  $Z = s'$ . Hence we have  $\Pr[Z' = s'] = \Pr[Z = s'] + \Pr[Z = s]$  and

$$\Pr[C = 0 | Z' = s'] = \frac{\Pr[Z = s'] \Pr[C = 0 | Z = s'] + \Pr[Z = s] \Pr[C = 0 | Z = s]}{\Pr[Z = s'] + \Pr[Z = s]}.$$

Now, if we set  $p = \Pr[Z = s']$ ,  $q = \Pr[Z = s]$ ,  $\alpha = \Pr[C = 0 | Z = s']$  and  $\beta = \Pr[C = 0 | Z = s]$ , and combine the previous two inline equalities, we have

$$\Delta_s F(S) = pf(\alpha) + qf(\beta) - (p + q)f\left(\frac{p\alpha + q\beta}{p + q}\right).$$

□

**Some Basic Tools:** In Lemmas 2 and 5 we show two basic properties of convex functions that later become handy in our proof. We use the following property of convex functions to prove Lemma 2. For any convex function  $f$  and any three numbers  $a < b < c$  we have

$$\frac{f(b) - f(a)}{b - a} \leq \frac{f(c) - f(b)}{c - b}. \quad (12)$$

Note that this also implies

$$\begin{aligned} \frac{f(c) - f(a)}{c - a} &= \frac{1}{c - a} (f(c) - f(b) + f(b) - f(a)) \\ &\leq \frac{1}{c - a} \left( f(c) - f(b) + \frac{b - a}{c - b} (f(c) - f(b)) \right) && \text{By Inequality 12} \\ &= \frac{1}{c - a} \left( \frac{c - b + b - a}{c - b} (f(c) - f(b)) \right) \\ &= \frac{f(c) - f(b)}{c - b}. \end{aligned} \quad (13)$$

Similarly we have

$$\begin{aligned}
 \frac{f(c) - f(a)}{c - a} &= \frac{1}{c - a} (f(c) - f(b) + f(b) - f(a)) \\
 &\geq \frac{1}{c - a} \left( \frac{c - b}{b - a} (f(b) - f(a)) + f(b) - f(a) \right) && \text{By Inequality 12} \\
 &\geq \frac{1}{c - a} \left( \frac{c - b + b - a}{b - a} (f(b) - f(a)) \right) \\
 &= \frac{f(b) - f(a)}{b - a}.
 \end{aligned} \tag{14}$$

**Proof of Lemma 2:**

*Proof.* First, we prove

$$\frac{f(p\alpha + q\gamma) - f(p\alpha + q\beta)}{q\gamma - q\beta} \leq \frac{f(\gamma) - f(\beta)}{\gamma - \beta}. \tag{15}$$

Recall that  $\alpha \leq \beta \leq \gamma$ , and  $p + q = 1$ . Hence we have  $p\alpha + q\beta \leq p\alpha + q\gamma \leq \beta \leq \gamma$ . We prove Inequality 15 in two cases of  $p\alpha + q\gamma \leq \beta$ , and  $\beta < p\alpha + q\gamma$ .

**Case 1.** In this case we have  $p\alpha + q\beta \leq p\alpha + q\gamma \leq \beta \leq \gamma$ . we have

$$\begin{aligned}
 \frac{f(p\alpha + q\gamma) - f(p\alpha + q\beta)}{q\gamma - q\beta} &= \frac{f(p\alpha + q\gamma) - f(p\alpha + q\beta)}{(p\alpha + q\gamma) - (p\alpha + q\beta)} \\
 &\leq \frac{f(\beta) - f(p\alpha + q\gamma)}{\beta - (p\alpha + q\gamma)} && \text{By Inequality 12} \\
 &\leq \frac{f(\gamma) - f(\beta)}{\gamma - \beta} && \text{By Inequality 12}
 \end{aligned}$$

**Case 2.** In this case we have  $p\alpha + q\beta \leq \beta \leq p\alpha + q\gamma \leq \gamma$ . we have

$$\begin{aligned}
 \frac{f(p\alpha + q\gamma) - f(p\alpha + q\beta)}{q\gamma - q\beta} &= \frac{f(p\alpha + q\gamma) - f(p\alpha + q\beta)}{(p\alpha + q\gamma) - (p\alpha + q\beta)} \\
 &\leq \frac{f(p\alpha + q\gamma) - f(\beta)}{(p\alpha + q\gamma) - \beta} && \text{By Inequality 13} \\
 &\leq \frac{f(\gamma) - f(\beta)}{\gamma - \beta} && \text{By Inequality 14.}
 \end{aligned}$$

Next we use Inequality 15 to prove the lemma. By multiplying both sides of Inequality 15 by  $q(\gamma - \beta)$  we have

$$f(p\alpha + q\gamma) - f(p\alpha + q\beta) \leq qf(\gamma) - qf(\beta).$$

By rearranging the terms and adding  $pf(\alpha)$  to both sides we have

$$(pf(\alpha) + qf(\beta)) - f(p\alpha + q\beta) \leq (pf(\alpha) + qf(\gamma)) - f(p\alpha + q\gamma),$$

as desired. □

**Proof of Lemma 5:**

*Proof.* We have

$$\begin{aligned}
 \frac{p + q}{p + q'} f\left(\frac{p\alpha + q\beta}{p + q}\right) + \frac{q' - q}{p + q'} f(\beta) &\geq f\left(\frac{p + q}{p + q'} \frac{p\alpha + q\beta}{p + q} + \frac{q' - q}{p + q'} \beta\right) && \text{By convexity} \\
 &= f\left(\frac{p\alpha + q\beta}{p + q'} + \frac{q' - q}{p + q'} \beta\right) \\
 &= f\left(\frac{p\alpha + q'\beta}{p + q'}\right).
 \end{aligned}$$

By multiplying both sides by  $p + q'$  we have

$$(p + q)f\left(\frac{p\alpha + q\beta}{p + q}\right) + q'f(\beta) - qf(\beta) \geq (p + q')f\left(\frac{p\alpha + q'\beta}{p + q'}\right).$$

By rearranging the terms and adding  $pf(\alpha)$  to both sides we have

$$pf(\alpha) + qf(\beta) - (p + q)f\left(\frac{p\alpha + q\beta}{p + q}\right) \leq pf(\alpha) + q'f(\beta) - (p + q')f\left(\frac{p\alpha + q'\beta}{p + q'}\right),$$

as desired. □

## A.2. Empirical Evaluation Details

We implement the neural network using TensorFlow and train it using the AdamOptimizer (Abadi et al., 2016; Kingma & Ba, 2014). The following set of neural network hyperparameters are tuned by evaluating 2000 different configurations on the hold-out set as suggested by a Gaussian Process black-box optimization routine.

| <b>hyperparameter</b> | <b>search range</b> |
|-----------------------|---------------------|
| hidden layer size     | [100, 1280]         |
| num hidden layers     | [1, 5]              |
| learning rate         | [1e-6, 0.01]        |
| gradient clip norm    | [1.0, 1000.0]       |
| $L_2$ -regularization | [0, 1e-4]           |
